# Supplementary material
Source: Springer Nature journal article supplement (https://www.springermedizin.de/resource/supplementary/13058_2010_2741_MOESM5_ESM.pdf/9702052)

A)

## Symmetric Division

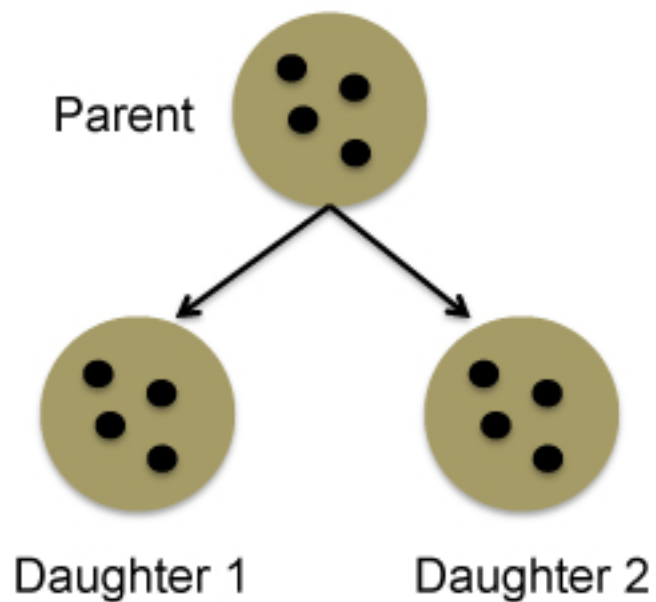

B)

## Asymmetric Division

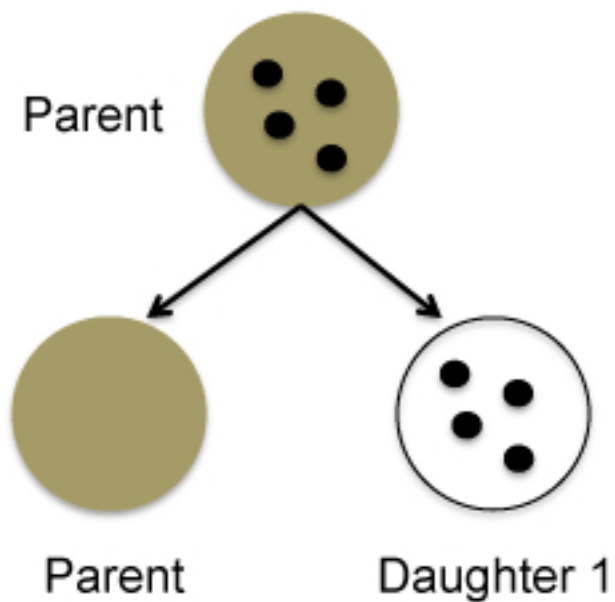

Supplement: MOESM5 [file 9702052]
